# Supplementary material for: Oropharyngeal Microbiome Profiled at Admission is Predictive of the Need for Respiratory Support Among COVID-19 Patients
Source: PubMed Central journal article supplement — medRxiv. 2022 Feb 28:2022.02.28.22271627. Preprint. [Version 1] doi: 10.1101/2022.02.28.22271627 (PMC8902889; doi:10.1101/2022.02.28.22271627), 2022-02-28

**PWY-1269: CMP-3-deoxy-D-manno-  
octulosonate biosynthesis I**

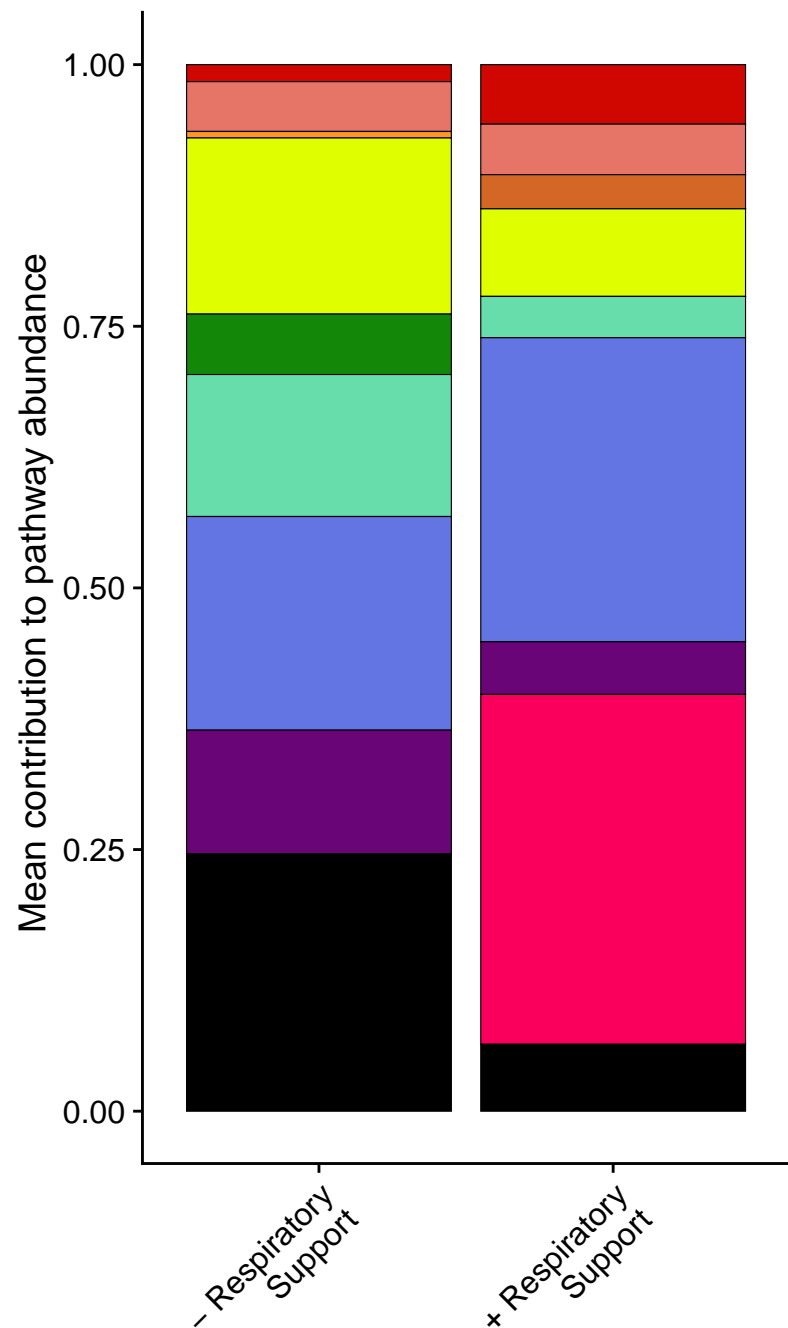

**NAGLIPASYN-PWY: lipid IVA  
biosynthesis**

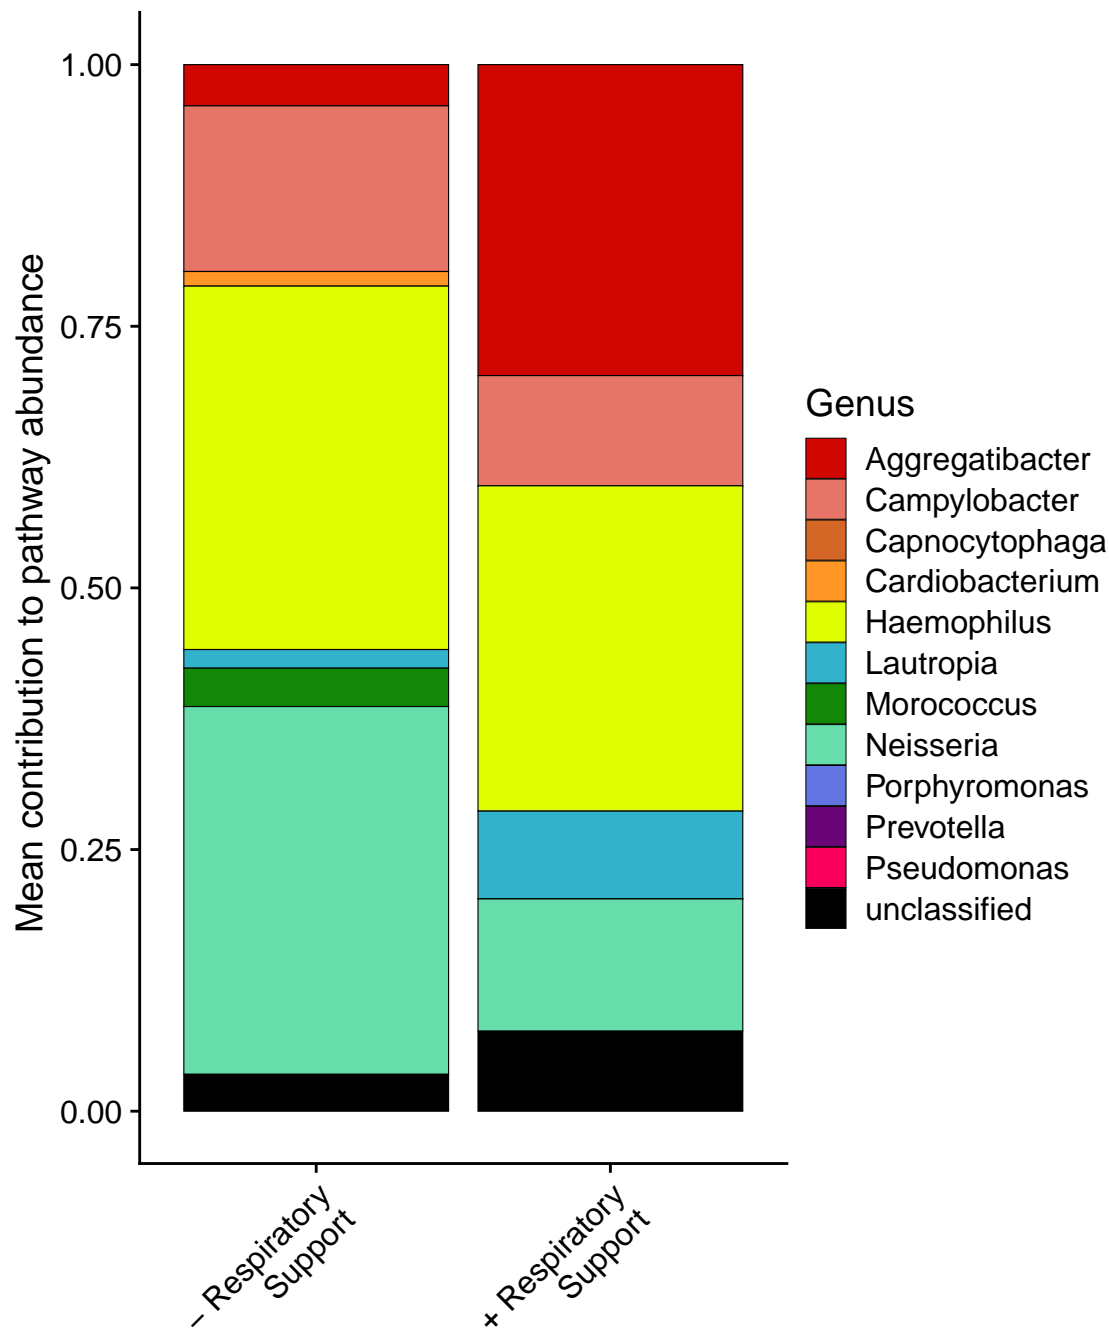

Supplement: media-1.pdf [file media-1.pdf]
