# Supplementary material for: Oropharyngeal Microbiome Profiled at Admission is Predictive of the Need for Respiratory Support Among COVID-19 Patients
Source: PubMed Central journal article supplement — medRxiv. 2022 Feb 28:2022.02.28.22271627. Preprint. [Version 1] doi: 10.1101/2022.02.28.22271627 (PMC8902889; doi:10.1101/2022.02.28.22271627), 2022-02-28
Supplement: media-2.pdf [file media-2.pdf]

| Model                                | Seed | TP | FP | TN | FN | Sensitivity | Specificity | Precision | Accuracy | F1   |
|--------------------------------------|------|----|----|----|----|-------------|-------------|-----------|----------|------|
| Bacterial Abundance                  | 111  | 35 | 11 | 1  | 3  | 0.92        | 0.08        | 0.76      | 0.72     | 0.83 |
| Bacterial Abundance                  | 112  | 35 | 11 | 1  | 3  | 0.92        | 0.08        | 0.76      | 0.72     | 0.83 |
| Bacterial Abundance                  | 113  | 35 | 11 | 1  | 3  | 0.92        | 0.08        | 0.76      | 0.72     | 0.83 |
| Bacterial Abundance                  | 114  | 35 | 11 | 1  | 3  | 0.92        | 0.08        | 0.76      | 0.72     | 0.83 |
| Bacterial Abundance                  | 115  | 35 | 10 | 2  | 3  | 0.92        | 0.17        | 0.78      | 0.74     | 0.84 |
| Bacterial Abundance                  | 116  | 35 | 10 | 2  | 3  | 0.92        | 0.17        | 0.78      | 0.74     | 0.84 |
| CC + Shannon Diversity               | 111  | 36 | 10 | 2  | 2  | 0.95        | 0.17        | 0.78      | 0.76     | 0.86 |
| CC + Shannon Diversity               | 112  | 36 | 10 | 2  | 2  | 0.95        | 0.17        | 0.78      | 0.76     | 0.86 |
| CC + Shannon Diversity               | 113  | 36 | 10 | 2  | 2  | 0.95        | 0.17        | 0.78      | 0.76     | 0.86 |
| CC + Shannon Diversity               | 114  | 36 | 10 | 2  | 2  | 0.95        | 0.17        | 0.78      | 0.76     | 0.86 |
| CC + Shannon Diversity               | 115  | 36 | 10 | 2  | 2  | 0.95        | 0.17        | 0.78      | 0.76     | 0.86 |
| CC + Shannon Diversity               | 116  | 36 | 10 | 2  | 2  | 0.95        | 0.17        | 0.78      | 0.76     | 0.86 |
| CC + Bacterial Abundance             | 111  | 35 | 9  | 3  | 3  | 0.92        | 0.25        | 0.80      | 0.76     | 0.85 |
| CC + Bacterial Abundance             | 112  | 36 | 10 | 2  | 2  | 0.95        | 0.17        | 0.78      | 0.76     | 0.86 |
| CC + Bacterial Abundance             | 113  | 36 | 11 | 1  | 2  | 0.95        | 0.08        | 0.77      | 0.74     | 0.85 |
| CC + Bacterial Abundance             | 114  | 36 | 9  | 3  | 2  | 0.95        | 0.25        | 0.80      | 0.78     | 0.87 |
| CC + Bacterial Abundance             | 115  | 36 | 10 | 2  | 2  | 0.95        | 0.17        | 0.78      | 0.76     | 0.86 |
| CC + Bacterial Abundance             | 116  | 35 | 10 | 2  | 3  | 0.92        | 0.17        | 0.78      | 0.74     | 0.84 |
| CC + Bacterial Abund. + Shannon Div. | 111  | 36 | 10 | 2  | 2  | 0.95        | 0.17        | 0.78      | 0.76     | 0.86 |
| CC + Bacterial Abund. + Shannon Div. | 112  | 36 | 9  | 3  | 2  | 0.95        | 0.25        | 0.80      | 0.78     | 0.87 |
| CC + Bacterial Abund. + Shannon Div. | 113  | 36 | 9  | 3  | 2  | 0.95        | 0.25        | 0.80      | 0.78     | 0.87 |
| CC + Bacterial Abund. + Shannon Div. | 114  | 36 | 10 | 2  | 2  | 0.95        | 0.17        | 0.78      | 0.76     | 0.86 |
| CC + Bacterial Abund. + Shannon Div. | 115  | 35 | 9  | 3  | 3  | 0.92        | 0.25        | 0.80      | 0.76     | 0.85 |
| CC + Bacterial Abund. + Shannon Div. | 116  | 35 | 10 | 2  | 3  | 0.92        | 0.17        | 0.78      | 0.74     | 0.84 |
